# Supplementary material for: Functional microvascularization of human myocardium in vitro
Source: PubMed Central journal article supplement — Cell Rep Methods. 2022 Aug 29;2(9):100280. doi: 10.1016/j.crmeth.2022.100280 (PMC9499876; doi:10.1016/j.crmeth.2022.100280), 2022-08-29
Supplement: mmc1.pdf [file mmc1.pdf]

**Cell Reports Methods, Volume 2**

**Supplemental information**

**Functional microvascularization**

**of human myocardium *in vitro***

**Oisín King, Daniela Cruz-Moreira, Alaa Sayed, Fatemeh Kermani, Worrapong Kit-Anan, Iona Sunyovszki, Brian X. Wang, Barrett Downing, Jerome Fourre, Daniel Hachim, Anna M. Randi, Molly M. Stevens, Marco Rasponi, and Cesare M. Terracciano**

## Supplementary Figures

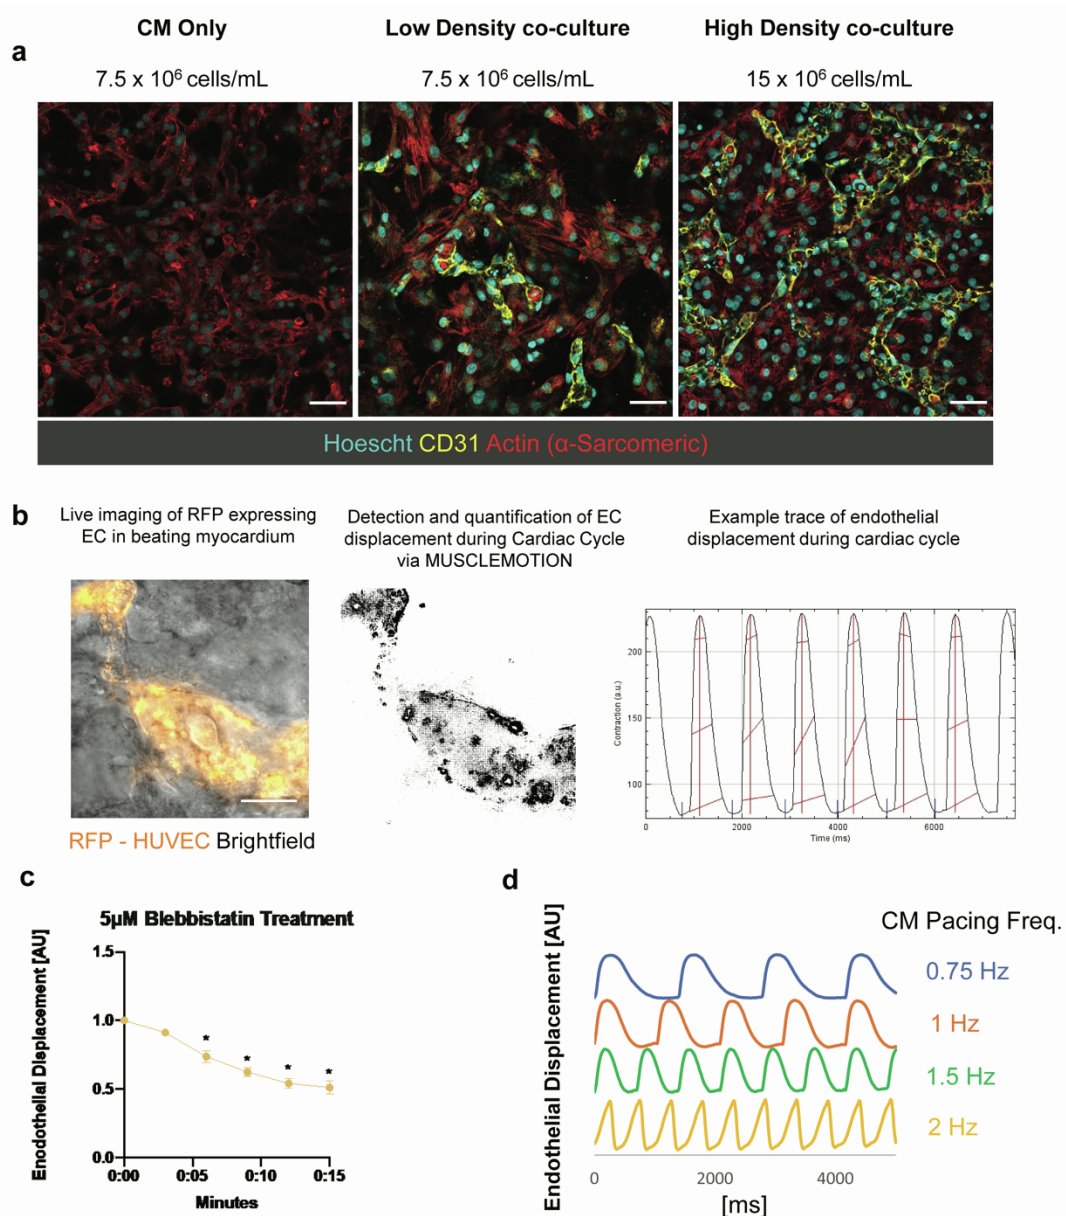

**Fig. S1 Fibrin hydrogel culture scaffold enables mechanical coupling between EC and CM** **a**, Optimisation of cell density for confluence in 3D fibrin hydrogel. hiPSC-CM (red) and hCMVEC (yellow) were visualised with immunofluorescent confocal microscopy in low and high density co-cultures to establish requisite conditions for confluence in 3D fibrin hydrogel. Scale bar = 50 μm. **b**, Experimental outline of live imaging of RFP-HUVEC to detect and quantify physical displacement of EC by CM contractility. Scale bar = 50 μm. **c**, Reduction of RFP-HUVEC displacement via inhibition of CM contractility via Blebbistatin treatment. Each

datapoint represents average value from 6 dishes, N=3. **d**, EC displacement rate depends on CM electrical simulation frequency. Data is shown as mean  $\pm$  SEM.  $^* = p < 0.05$ . Related to figure 1 and 2 of main text.

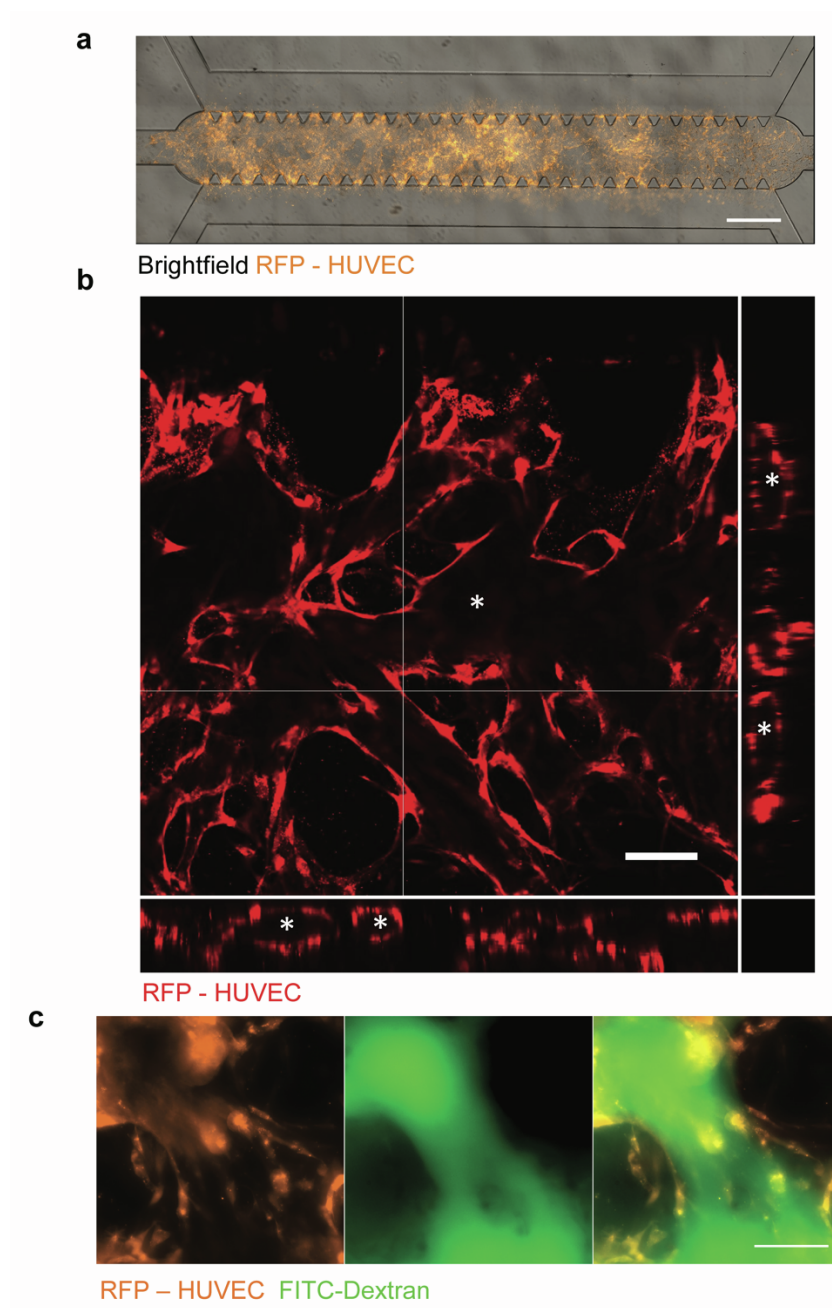

**Fig. S2 Organisation of microvascular network in EC-FB microfluidic co-culture**

**a**, Widefield tile showing distribution of RFP-HUVEC in microfluidic chip after 1 week coculture with hLVFB. Scale bar = 1mm **b**, Confocal z-stack showing endothelial network with

continuous open lumen. White asterisks indicate open luminal spaces. Scale bar = 50  $\mu\text{m}$ . **c**,  
Perfusion of 40kDa FITC-Dextran through microvasculature in EC-FB co-culture. Scale bar =  
50  $\mu\text{m}$ . Related to figures 3 and 4 of main text.
